# Supplementary material
Source: MDPI journal article supplement (https://www.mdpi.com/2073-4352/7/6/158)

## Electronic Supplementary Information for

### Effects of changing substituents on the NLO properties of two coumarin derivatives

Basílio Baseia<sup>‡,†,\*</sup>, Francisco A. P. Osório<sup>‡,§</sup>, Larissa Ferreira Lima<sup>§</sup> and Clodoaldo Valverde<sup>†,§,\*</sup>

<sup>‡</sup> Instituto de Física, Universidade Federal de Goiás, 74.690-900, Goiânia, GO, Brazil

<sup>§</sup> Universidade Paulista, 74845-090, Goiânia, GO, Brazil.

<sup>†</sup> Campus de Ciências Exatas e Tecnológicas, Universidade Estadual de Goiás, 75001-970, Anápolis, GO, Brazil.

<sup>§</sup> Escola de Ciências Exatas e da Computação, Pontifícia Universidade Católica de Goiás, 74605-10, Goiânia, GO, Brazil.

<sup>‡</sup> Departamento de Física, Universidade Federal da Paraíba, 58.051-970, João Pessoa, PB, Brazil.

\* Corresponding author: B. Baseia ([basiliobaseia@yahoo.com.br](mailto:basiliobaseia@yahoo.com.br)) and C. Valverde ([valverde@ueg.br](mailto:valverde@ueg.br))

#### Contents Page

|                                                                                                                           |   |
|---------------------------------------------------------------------------------------------------------------------------|---|
| Table ESI 1: MP2/6-311+G(d) results for the HOMO-LUMO for the compounds I.....                                            | 1 |
| Table ESI 2: MP2/6-311+G(d) results for the HOMO-LUMO for the compounds I.....                                            | 1 |
| Table ESI 3: The HOMO-LUMO frontiers orbitals for the coumarins compounds I and II in three different solvent media. .... | 2 |

Table ESI 1: MP2/6-311+G(d) results for the HOMO-LUMO for the compounds I.

| CH3               | HOMO  | LUMO  |
|-------------------|-------|-------|
|                   | eV    | eV    |
| Acetone           | -7.70 | -1.57 |
| Chloroform        | -7.62 | -1.56 |
| Dichloromethane   | -7.67 | -1.56 |
| DiMethylSulfoxide | -7.71 | -1.57 |
| Ethanol           | -7.70 | -1.57 |
| Gas-Phase         | -7.43 | -1.58 |
| Methanol          | -7.71 | -1.57 |
| Water             | -7.72 | -1.57 |

Table ESI 2: MP2/6-311+G(d) results for the HOMO-LUMO for the compounds I.

| OCH <sub>3</sub> | HOMO | LUMO |
|------------------|------|------|
|                  | eV   | eV   |

|                   |       |       |
|-------------------|-------|-------|
| Acetone           | -7.69 | -1.57 |
| Chloroform        | -7.60 | -1.56 |
| Dichloromethane   | -7.65 | -1.57 |
| DiMethylSulfoxide | -7.70 | -1.57 |
| Ethanol           | -7.69 | -1.57 |
| Gas-Phase         | -7.38 | -1.57 |
| Methanol          | -7.70 | -1.57 |
| Water             | -7.71 | -1.57 |

Table ESI 3: The HOMO-LUMO frontiers orbitals for the coumarins compounds I and II in three different solvent media.

| R21 (CH <sub>3</sub> )                                                                                                                                 | R22 (OCH <sub>3</sub> )                                                                                                                                 |
|--------------------------------------------------------------------------------------------------------------------------------------------------------|---------------------------------------------------------------------------------------------------------------------------------------------------------|
| <p>Chloroform</p> 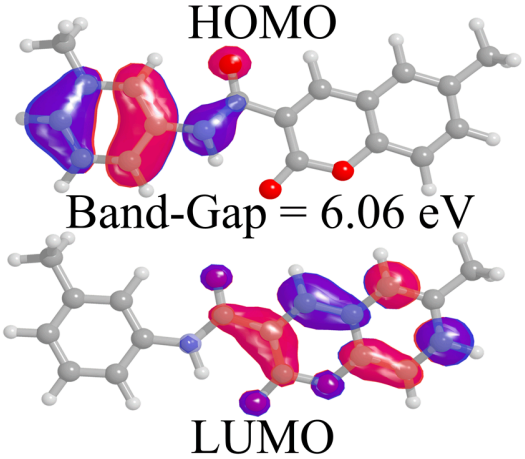 <p>HOMO</p> <p>Band-Gap = 6.06 eV</p> <p>LUMO</p> | <p>Chloroform</p>  <p>HOMO</p> <p>Band-Gap = 6.04 eV</p> <p>LUMO</p> |
| DMSO                                                                                                                                                   | DMSO                                                                                                                                                    |

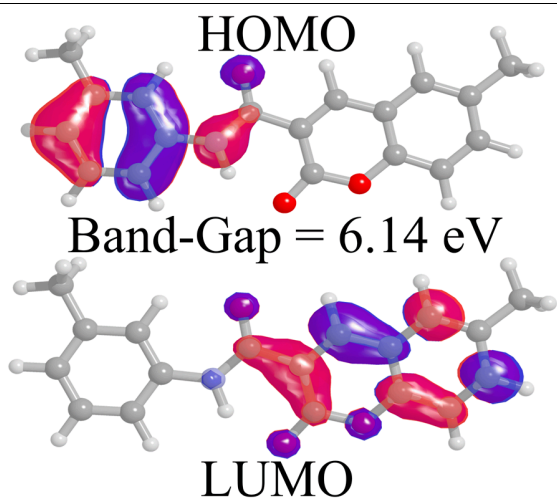

Ethanol

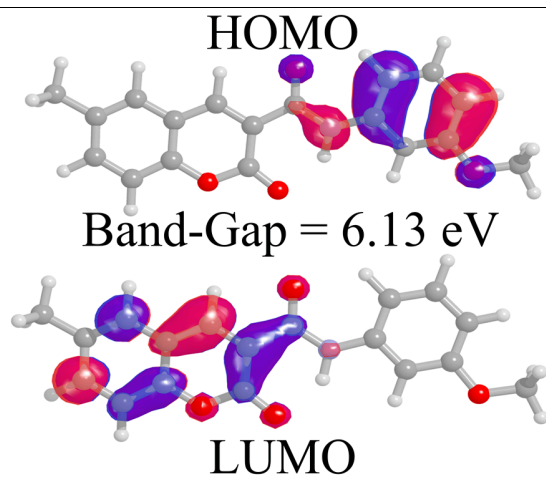

Ethanol

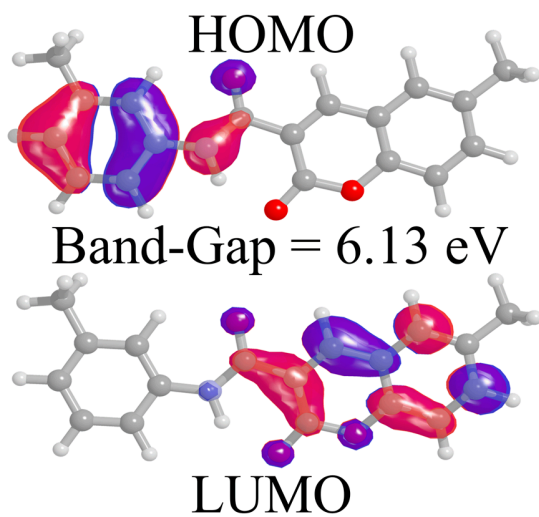

Methanol

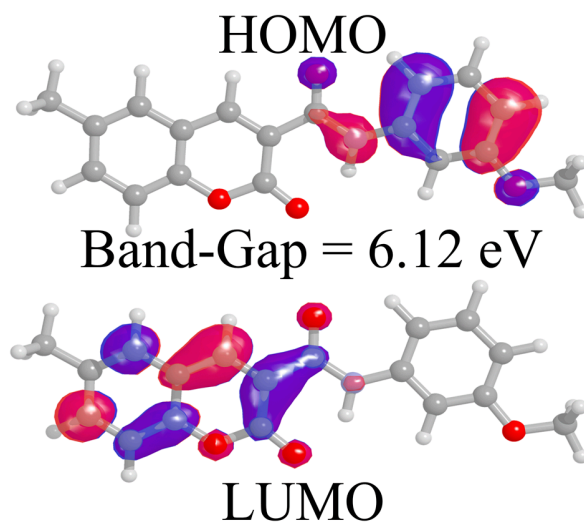

Methanol

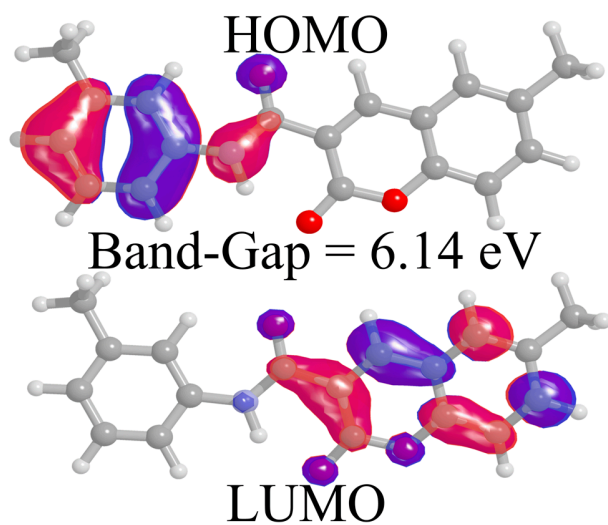

Water

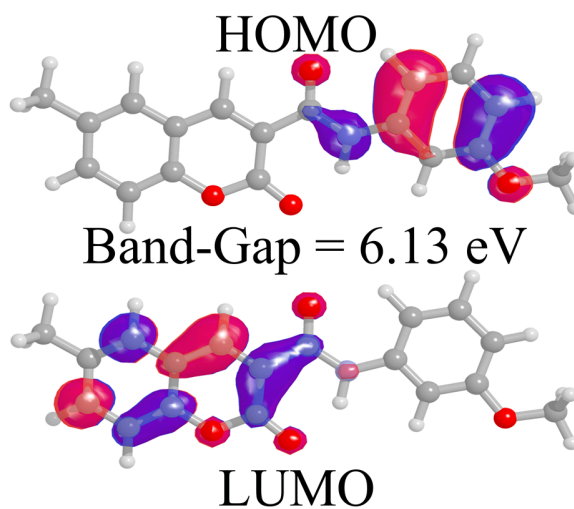

Water

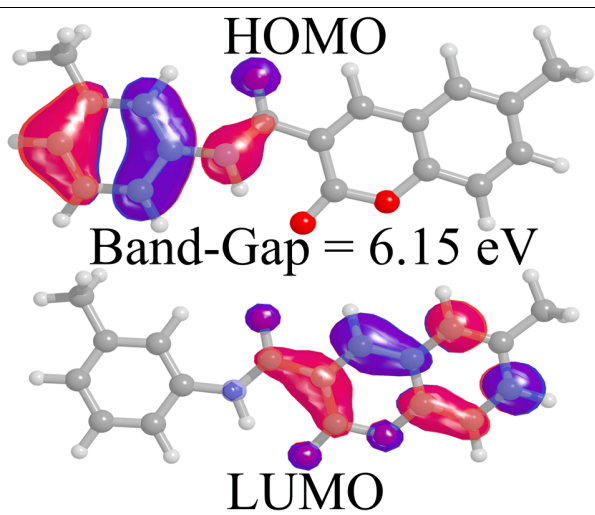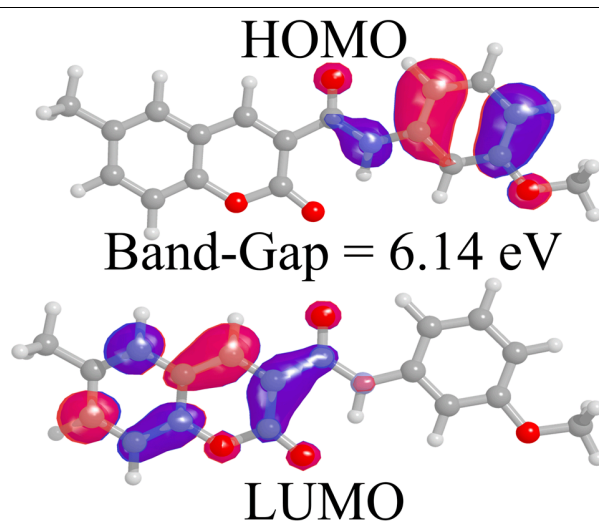

Supplement: s1 [file s1]
